# Supplementary material for: Oriented two-dimensional zeolitic imidazolate framework-L membranes and their gas permeation properties
Source: Royal Society of Chemistry journal article supplement (doi:10.1039/c5ta03707g), 2015-01-01
Supplement: c5ta03707g1.pdf [file c5ta03707g1.pdf]

## Electronic Supplementary Information

### Oriented Two-dimensional Zeolitic Imidazolate Framework-L

#### Membranes and their Gas Permeation Properties

Zhaoxiang Zhong<sup>ab</sup>, Jianfeng Yao,<sup>b</sup> Rizhi Chen,<sup>b</sup> Zexian Low,<sup>b</sup> Ming He,<sup>b</sup> Jefferson Zhe Liu<sup>c</sup> and Huanting Wang<sup>\*b</sup>

<sup>a</sup> State Key Laboratory of Materials-Oriented Chemical Engineering, National Engineering Research Center for Special Separation Membrane, Nanjing Tech University, Nanjing 210009, China.

<sup>b</sup>Department of Chemical Engineering, Monash University, Clayton, Victoria 3800, Australia. Email: [haunting.wang@monash.edu](mailto:haunting.wang@monash.edu)

<sup>c</sup> Department of Mechanical and Aerospace Engineering, Monash University, Clayton, Victoria 3800, Australia

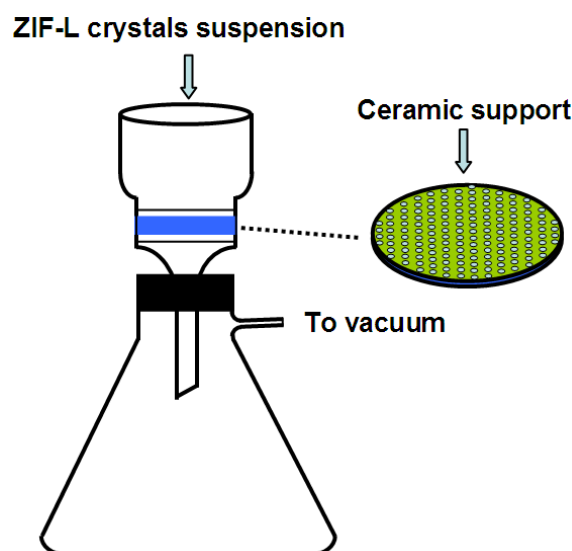

**Figure S1.** Coating of ZIF-L crystals on the membrane by vacuum filtration technique.

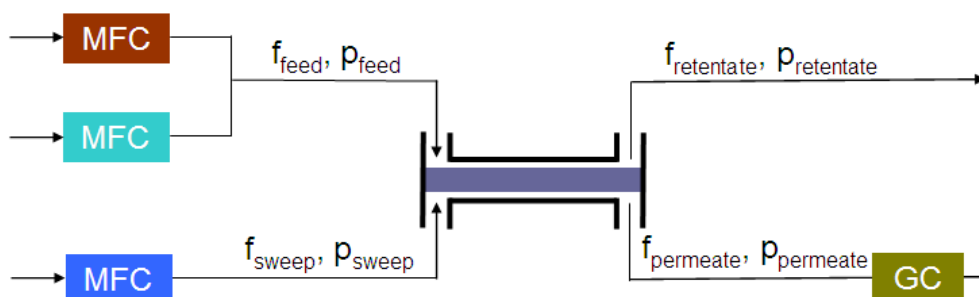

**Figure S2.** Permeation equipment for the binary gas mixture separation.

“MFC” and “GC” are mass flow controller and gas chromatography, respectively. “f” and “p” are the flow rate and pressure, respectively. During the measurements,  $P_{\text{feed}}$  was maintained at 2 bar,  $P_{\text{sweep}}$  was constant at

1 bar.

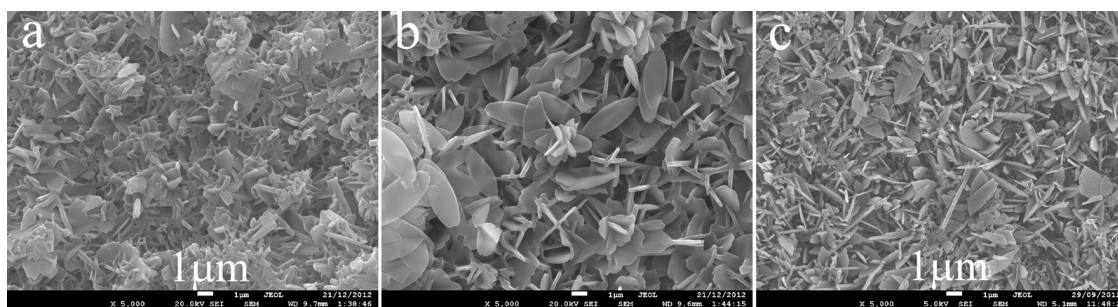

**Figure S3.** SEM images of ZIF-L membrane after 0.5 (a) and 1.0 h (b) secondary growth, and ZIF-L membrane prepared by in-situ growth at 30 °C for 2 h.

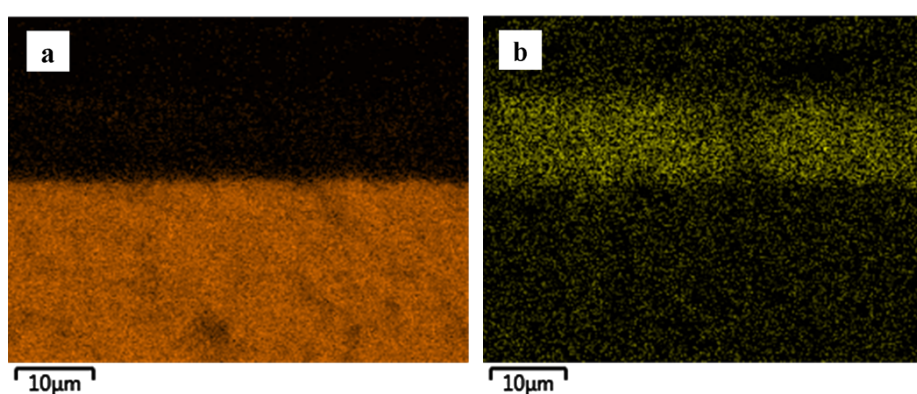

**Figure S4.** EDXS mapping of the ZIF-L membrane: orange Al, yellow Zn

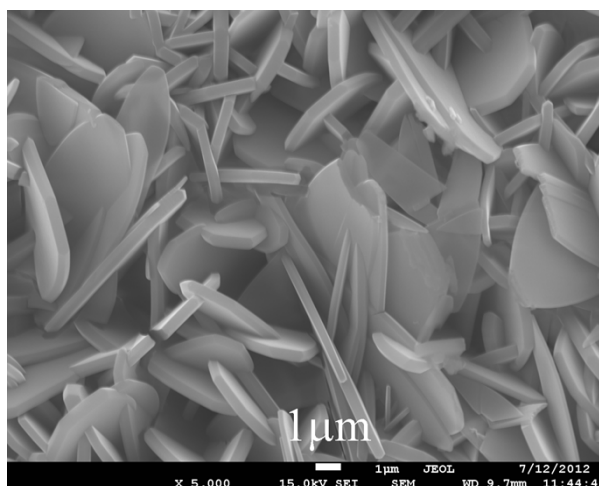

**Figure S5.** SEM image of ZIF-L membrane after 2 h secondary growth on ZIF-L seeding support by PEI-assisted filtration-deposition.
